# Supplementary material
Source: PubMed Central journal article supplement (PMC3043481)

Table S1

“Top 100” serotypes of *Salmonella* (2002-2006)

| Rank | Serotype                        | Subsp. | O Group | O Antigen     | H1    | H2      |
|------|---------------------------------|--------|---------|---------------|-------|---------|
| 1    | Typhimurium                     | I      | B       | 4,[5],12      | i     | 1,2     |
| 2    | Enteritidis                     | I      | D1      | 9,12          | g,m   | -       |
| 3    | Newport                         | I      | C2      | 6,8,[20]      | e,h   | 1,2     |
| 4    | Heidelberg                      | I      | B       | 4,[5],12      | r     | 1,2     |
| 5    | Javiana                         | I      | D1      | 9,12          | l,z28 | 1,5     |
| 6    | Montevideo                      | I      | C1      | 6,7,[14]      | g,m,s | -       |
| 7    | Muenchen                        | I      | C2      | 6,8           | d     | 1,2     |
| 8    | I 4,[5],12:i:-                  | I      | B       | 4,[5],12      | i     | -       |
| 9    | Saintpaul                       | I      | B       | 4,[5],12      | e,h   | 1,2     |
| 10   | Oranienburg                     | I      | C1      | 6,7,[14]      | m,t   | -       |
| 11   | Braenderup                      | I      | C1      | 6,7,[14]      | e,h   | e,n,z15 |
| 12   | Infantis                        | I      | C1      | 6,7,[14]      | r     | 1,5     |
| 13   | Mississippi                     | I      | G       | 13,23         | b     | 1,5     |
| 14   | Thompson                        | I      | C1      | 6,7,[14]      | k     | 1,5     |
| 15   | Agona                           | I      | B       | 4,[5],12      | f,g,s | -       |
| 16   | Paratyphi B var. L(+) tartrate+ | I      | B       | 4,[5],12      | b     | 1,2     |
| 17   | Typhi                           | I      | D1      | 9,12,[Vi]     | d     | -       |
| 18   | Berta                           | I      | D1      | 9,12          | f,g,t | -       |
| 19   | Hadar                           | I      | C2      | 6,8           | z10   | e,n,x   |
| 20   | Stanley                         | I      | B       | 4,[5],12,[27] | d     | 1,2     |
| 21   | Poona                           | I      | G       | 13,22         | z     | 1,6     |
| 22   | Bareilly                        | I      | C1      | 6,7,[14]      | y     | 1,5     |
| 23   | Anatum                          | I      | E1      | ]             | e,h   | 1,6     |
| 24   | Hartford                        | I      | C1      | 6,7           | y     | e,n,x   |
| 25   | Mbandaka                        | I      | C1      | 6,7,[14]      | z10   | e,n,z15 |
| 26   | Panama                          | I      | D1      | 9,12          | l,v   | 1,5     |
| 27   | Paratyphi B                     | I      | B       | 4,[5],12      | b     | 1,2     |
| 28   | Litchfield                      | I      | C2      | 6,8           | l,v   | 1,2     |
| 29   | Sandiego                        | I      | B       | 4,[5],12      | e,h   | e,n,z15 |
| 30   | Schwarzengrund                  | I      | B       | 4,12,[27]     | d     | 1,7     |
| 31   | Derby                           | I      | B       | 4,[5],12      | f,g   | -       |
| 32   | Paratyphi A                     | I      | A       | 2,12          | a     | -       |
| 33   | Tennessee                       | I      | C1      | 6,7,[14]      | z29   | -       |
| 34   | Brandenburg                     | I      | B       | 4,[5],12      | l,v   | e,n,z15 |
| 35   | Senftenberg                     | I      | E4      | 1,3,19        | g,s,t | -       |
| 36   | Norwich                         | I      | C1      | 6,7           | e,h   | 1,6     |
| 37   | Rubislaw                        | I      | F       | 11            | r     | e,n,x   |
| 38   | Give                            | I      | E1      | ]             | l,v   | 1,7     |
| 39   | Miami                           | I      | D1      | 9,12          | a     | 1,5     |
| 40   | Gaminara                        | I      | I       | 16            | d     | 1,7     |
| 41   | Weltevreden                     | I      | E1      | 3,10[15]      | r     | z6      |
| 42   | Bovismorbificans                | I      | C2      | 6,8,[20]      | r     | 1,5     |
| 43   | Kentucky                        | I      | C2      | 8,[20]        | i     | z6      |
| 44   | Virchow                         | I      | C1      | 6,7,[14]      | r     | 1,2     |
| 45   | Muenster                        | I      | E1      | ]             | e,h   | 1,5     |
| 46   | Dublin                          | I      | D1      | 1,9,12,[Vi]   | g,p   | -       |
| 47   | Manhattan                       | I      | C2      | 6,8           | d     | 1,5     |
| 48   | Pomona                          | I      | M       | 28            | y     | 1,7     |
| 49   | Reading                         | I      | B       | 4,[5],12      | e,h   | 1,5     |
| 50   | Adelaide                        | I      | O       | 35            | f,g   | -       |

Table S1 con't

| Rank | Serotype                     | Subsp. | O Group | O Antigen   | H1          | H2      |
|------|------------------------------|--------|---------|-------------|-------------|---------|
| 51   | Ohio                         | I      | C1      | 6,7,[14]    | b           | l,w     |
| 52   | Blockley                     | I      | C2      | 6,8         | k           | 1,5     |
| 53   | Kiambu                       | I      | B       | 4,12        | z           | 1,5     |
| 54   | Uganda                       | I      | E1      | 3,10[15]    | l,z13       | 1,5     |
| 55   | Urbana                       | I      | N       | 30          | b           | e,n,x   |
| 56   | I 4,[5],12:b:-               | I      | B       | 4,[5],12    | b           | -       |
| 57   | Minnesota                    | I      | L       | 21          | b           | e,n,x   |
| 58   | Inverness                    | I      | P       | 38          | k           | 1,6     |
| 59   | Hvittingfoss                 | I      | I       | 16          | b           | e,n,x   |
| 60   | Bardo                        | I      | C2      | 8           | e,h         | 1,2     |
| 61   | Bredeney                     | I      | B       | 4,12,[27]   | l,v         | 1,7     |
| 62   | London                       | I      | E1      | 3,10[15]    | l,v         | 1,6     |
| 63   | Telekebir                    | I      | G       | 13,23       | d           | e,n,z15 |
| 64   | Havana                       | I      | G       | 13,23       | f,g,s       | -       |
| 65   | Johannesburg                 | I      | R       | 40          | b           | e,n,x   |
| 66   | Cerro                        | I      | K       | [6],[14],18 | z4,z23      | -       |
| 67   | Albany                       | I      | C2      | 8,[20]      | z4,z24      | -       |
| 68   | Chester                      | I      | B       | 4,[5],12    | e,h         | e,n,x   |
| 69   | Worthington                  | I      | G       | 13,23       | z           | l,w     |
| 70   | Indiana                      | I      | B       | 4,12        | z           | 1,7     |
| 71   | Istanbul                     | I      | C2      | 8           | z10         | e,n,x   |
| 72   | Oslo                         | I      | C1      | 6,7,[14]    | a           | e,n,x   |
| 73   | Agbeni                       | I      | G       | 13,23       | g,m,[s],[t] | -       |
| 74   | Grumpensis                   | I      | G       | 13,23       | d           | 1,7     |
| 75   | IV 48:g,z51:-                | IV     | Y       | 48          | g,z51       | -       |
| 76   | Alachua                      | I      | O       | 35          | z4,z23      | -       |
| 77   | Cubana                       | I      | G       | 13,23       | z29         | -       |
| 78   | Haardt                       | I      | C2      | 8           | k           | 1,5     |
| 79   | Eastbourne                   | I      | D1      | 9,12        | e,h         | 1,5     |
| 80   | Lomalinda                    | I      | D1      | 9,12        | a           | e,n,x   |
| 81   | IV 50:z4,z23:-               | IV     | Z       | 50          | z4,z23      | -       |
| 82   | Edinburg                     | I      | C1      | 6,7,[14]    | b           | 1,5     |
| 83   | Baildon                      | I      | D2      | 9,46        | a           | e,n,x   |
| 84   | Ealing                       | I      | O       | 35          | g,m,s       | -       |
| 85   | IV 50:g,z51:-                | IV     | Z       | 50          | g,z51       | -       |
| 86   | Monschau                     | I      | O       | 35          | m,t         | -       |
| 87   | IV 44:z4,z23:-               | IV     | V       | 44          | z4,z23      | -       |
| 88   | Choleraesuis                 | I      | C1      | 6,7         | c           | 1,5     |
| 89   | Meleagridis                  | I      | E1      | ]           | e,h         | l,w     |
| 90   | Kottbus                      | I      | C2      | 6,8         | e,h         | 1,5     |
| 91   | Kintambo                     | I      | G       | 13,23       | m,t         | -       |
| 92   | Corvallis                    | I      | C2      | 8,[20]      | z4,z23      | -       |
| 93   | I 9,12:l,z28:-               | I      | D1      | 9,12        | l,z28       | -       |
| 94   | Ibadan                       | I      | G       | 13,22       | b           | 1,5     |
| 95   | Rissen                       | I      | C1      | 6,7,[14]    | f,g         | -       |
| 96   | IIIa 18:z4,z23:-             | IIIa   | K       | 18          | z4,z23      | -       |
| 97   | Nima                         | I      | M       | 28          | y           | 1,5     |
| 98   | Irumu                        | I      | C1      | 6,7         | l,v         | 1,5     |
| 99   | Pensacola                    | I      | D1      | 9,12        | m,t         | -       |
| 100  | Choleraesuis var. Kunzendorf | I      | C1      | 6,7         | c           | 1,5     |

Fig. S1  
H:1,5 lineages

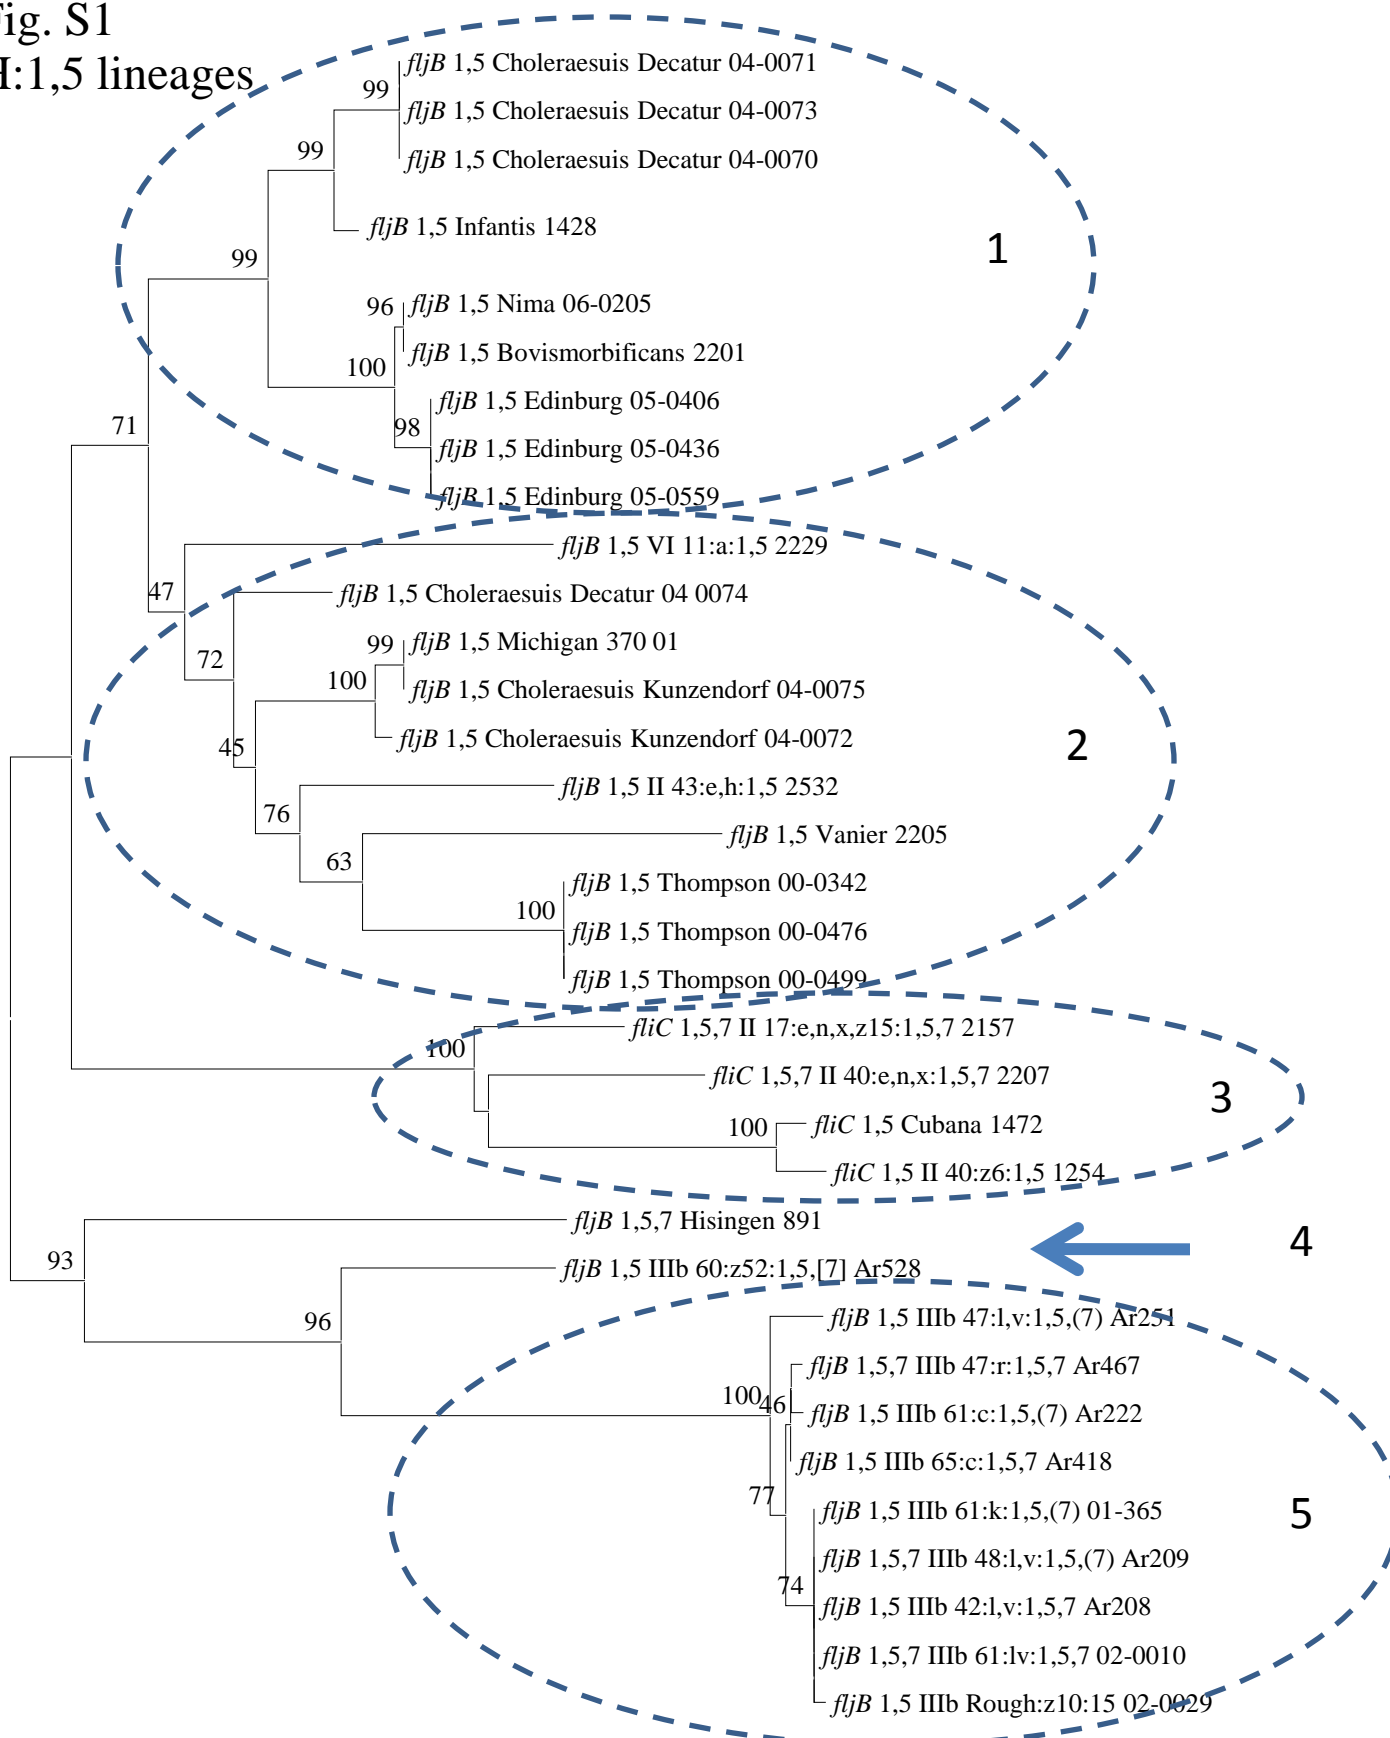

0.005

Fig. S2

H:a lineages

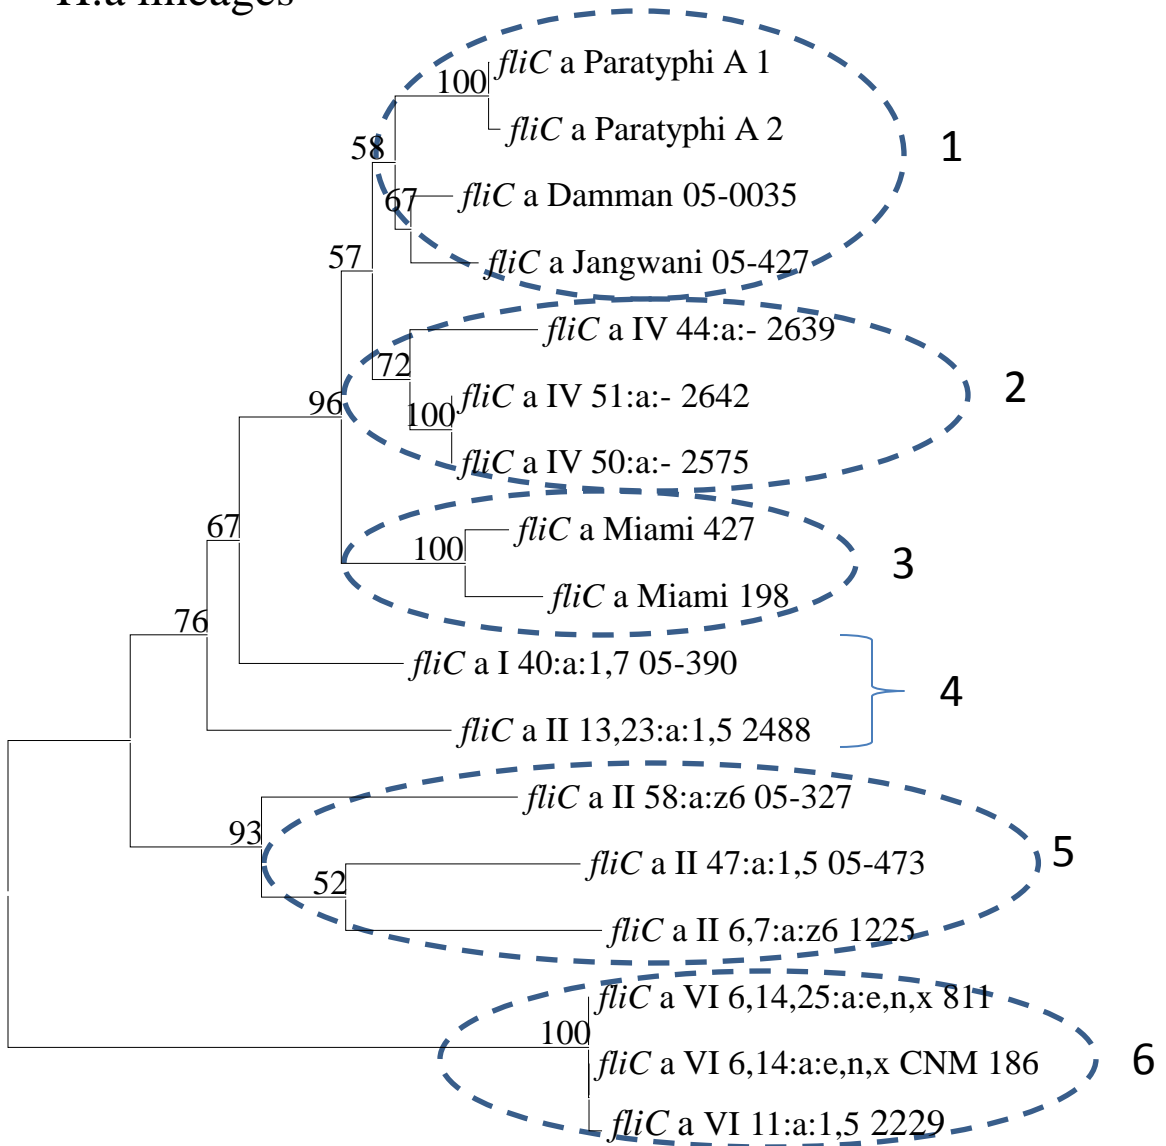

0.005

Fig. S3

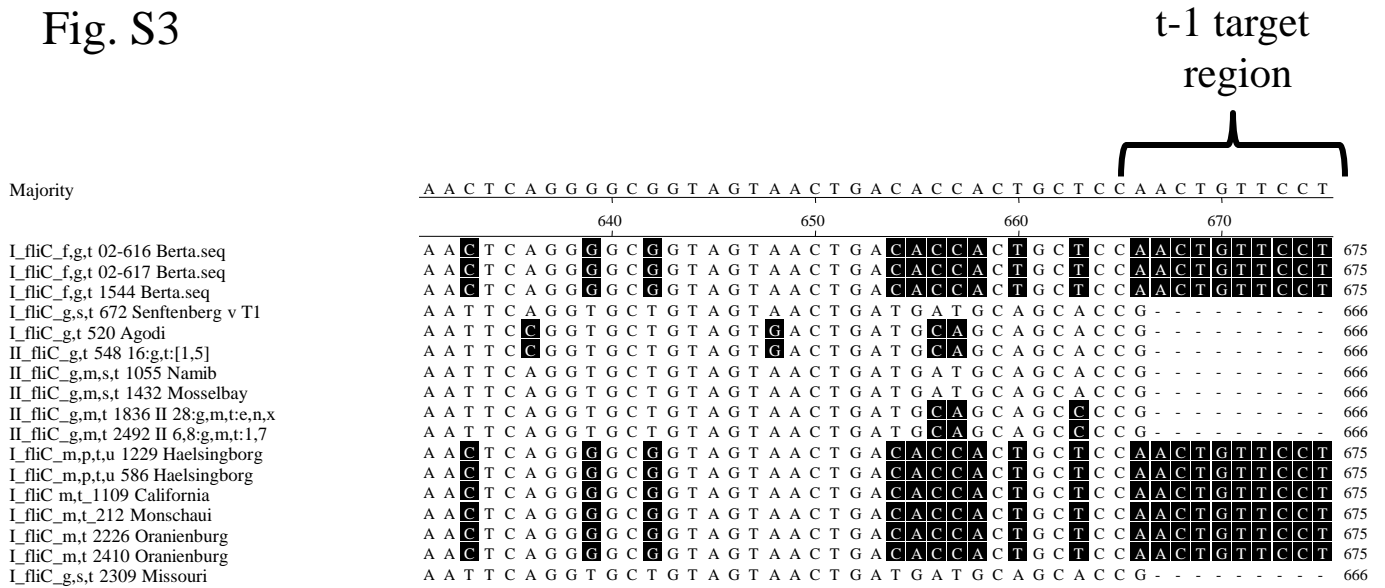

Fig. S4

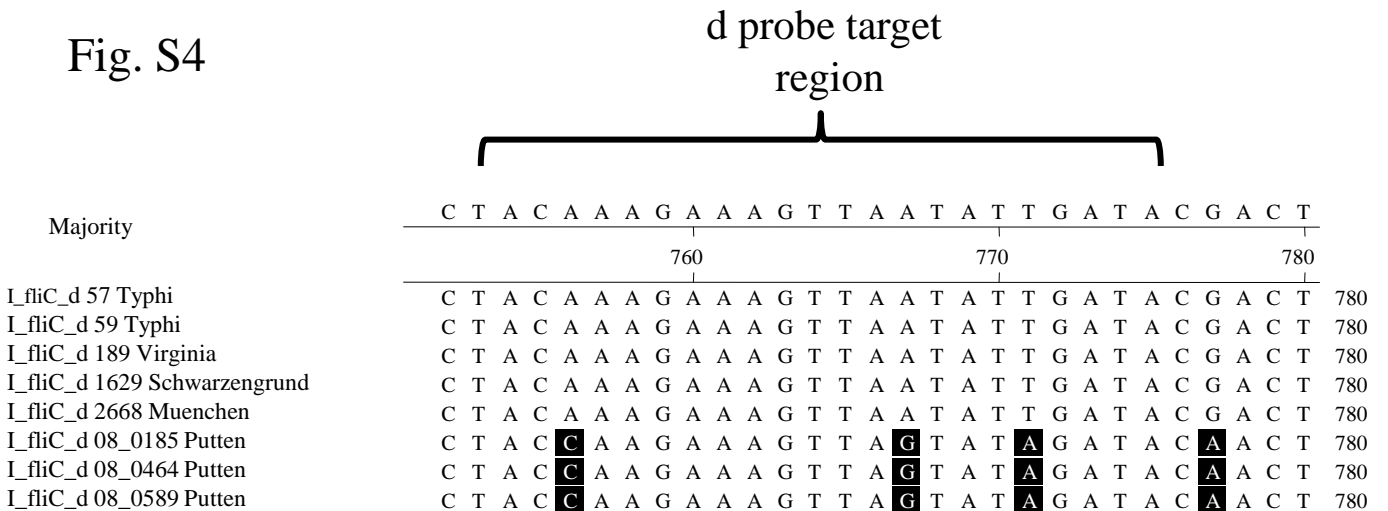

Supplement: supp_49_2_565__1.pdf [file supp_49_2_565__1.pdf]
